# Supplementary material for: VEGF Detection via Simplified FLISA Using a 3D Microfluidic Disk Platform
Source: Preprints.org preprint supplement (doi:10.20944/preprints202101.0119.v1), 2021-01-06
Supplement: Supplementary file 1 [file supplementary]

SUPPLEMENTARY MATERIALS

VEGF Detection via Simplified FLISA using a 3D Microfluidic Disk Platform

Dong Hee Kang 1, Na Kyong Kim 1, Sang-Woo Park 2,*, and Hyun Wook Kang 1,*

*1**Department of Mechanical Engineering, Chonnam National University*

*77 Youngbong-ro, Buk-gu, Gwangju 61186, Republic of Korea*

*2 Department of Ophthalmology, Chonnam National University Medical School*

*and Hospital, Baekseo-ro, Dong-gu, Gwangju 61469, Republic of Korea*

*December 2020*

† Co-correspondence to Prof. Hyun Wook Kang and Prof. Sang-Woo Park

Tel) +82-62-530-1662

Fax) +82-62-560-1689

E-mail) (H.W.K) kanghw@chonnam.ac.kr ; (S.W.P) exo70@naver.com

**Supplementary Materials**

**Figure. S1.** Angular velocity of disk with respect to time for the mixing cycle during incubation and the bead washing process.

**Figure. S2.** SEM images of micropillars (designed diameter (D) =500, 250, 200, and 100 μm) on 3D printed surface fabricated in the (a–d) vertical and (e–h) lateral directions.

**Figure. S3.** (a) Top view of 3D-printed block. (b) Isometric view and (c) sectional view of the 3D-printed block.

**
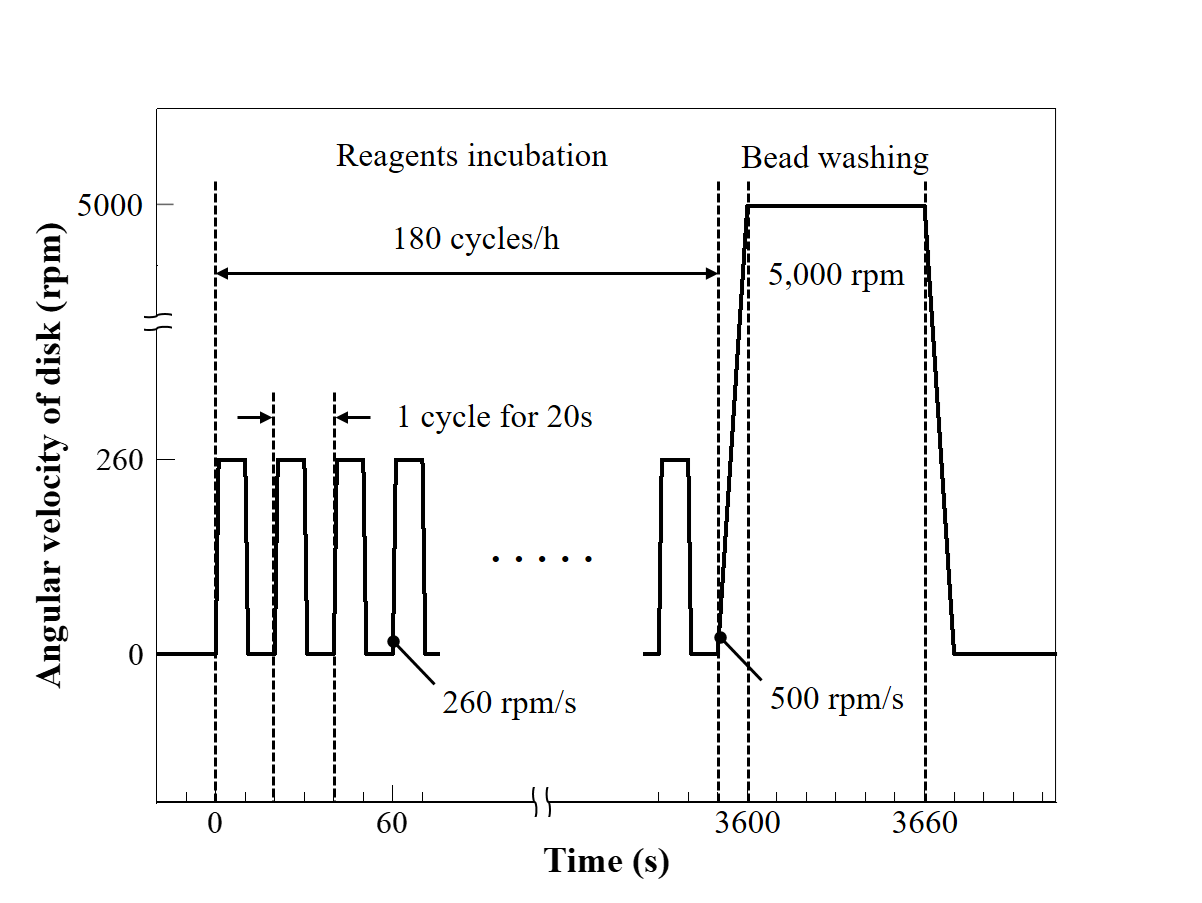
**

**Figure. S1.** Angular velocity of disk with respect to time for the mixing cycle during incubation and the bead washing process.

**
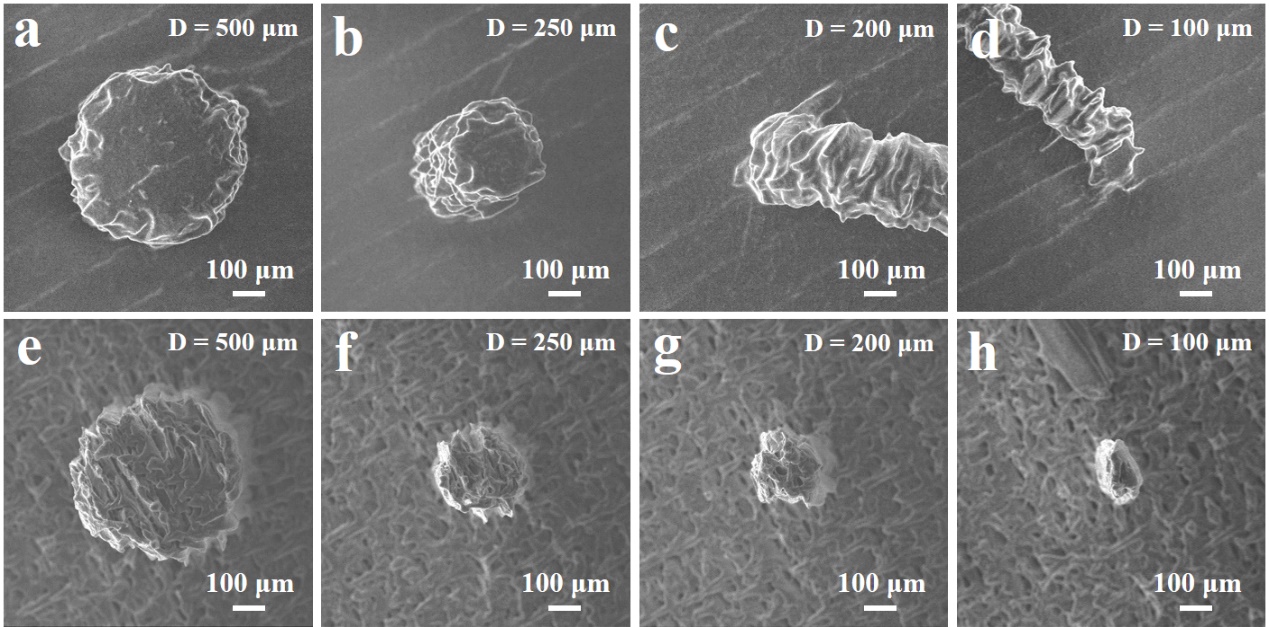
**

**Figure. S2.** SEM images of micropillars (designed diameter (D) =500, 250, 200, and 100 μm) on 3D printed surface fabricated in the (a–d) vertical and (e–h) lateral directions.

**
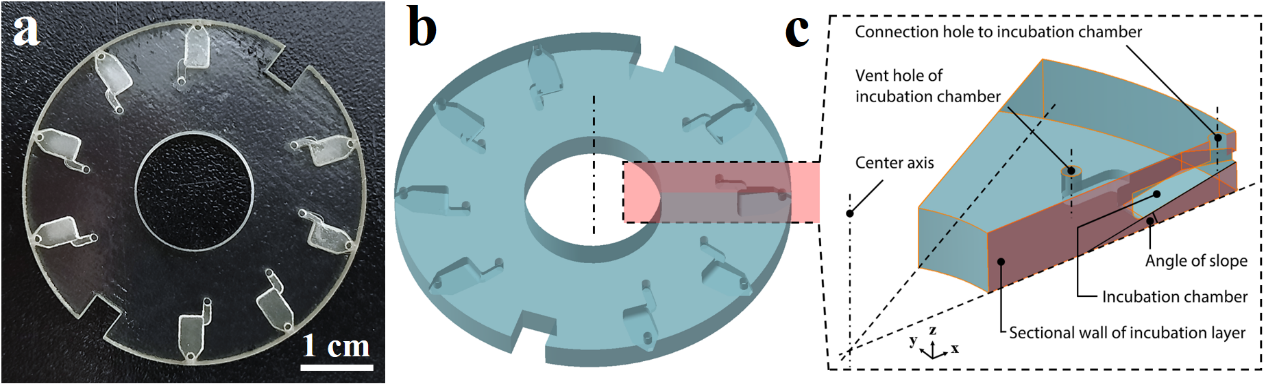
**

**Figure. S3.** (a) Top view of 3D-printed block. (b) isometric view and (c) sectional view of the 3D-printed block.
